# Supplementary material for: The RNA binding proteins LARP4A and LARP4B promote sarcoma and carcinoma growth and metastasis
Source: PubMed Central journal article supplement — iScience. 2024 Feb 24;27(4):109288. doi: 10.1016/j.isci.2024.109288 (PMC10963253; doi:10.1016/j.isci.2024.109288), 2024-02-24

LARP4A top  
GAPDH bottom  
Fig3A PC3/MG63 panels

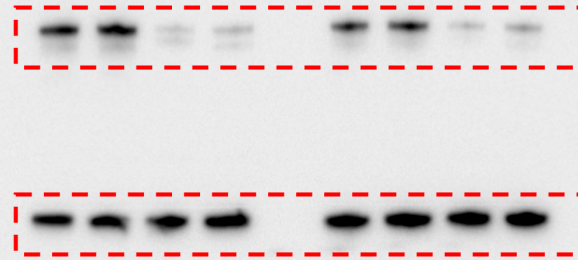

LARP4B top  
GAPDH bottom  
Fig3A PC3/MG63 panels

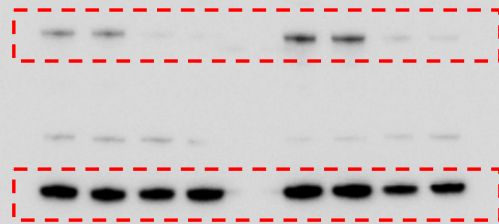

LARP4B/GAPDH Blot

LARP4A Blot (MNNG/HOS LHS, other OS cell line not used for paper RHS.  
LARP4A Top panel, GAPDH bottom)

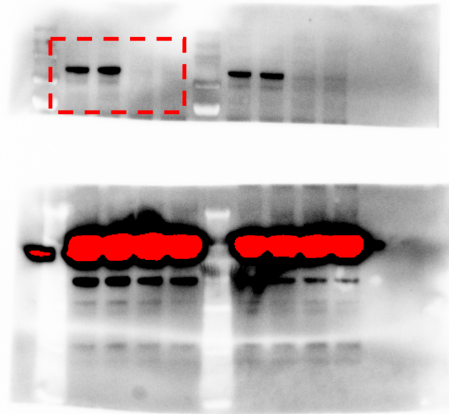

Same blot, shorter exposure for GAPDH

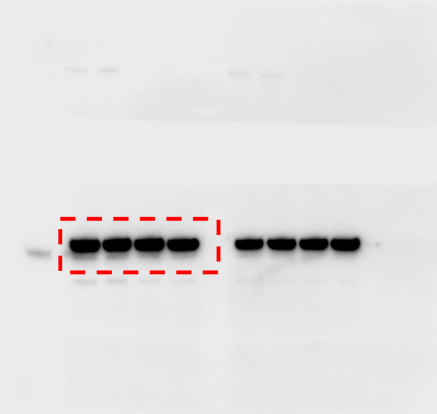

LARP4B Blot (MNNG/HOS LHS, other OS cell line not used for paper RHS.  
LARP4B Top panel, GAPDH bottom)

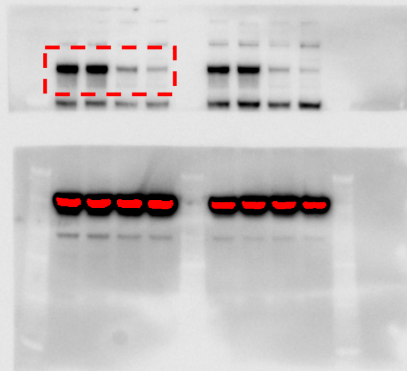

Same blot, shorter exposure for GAPDH

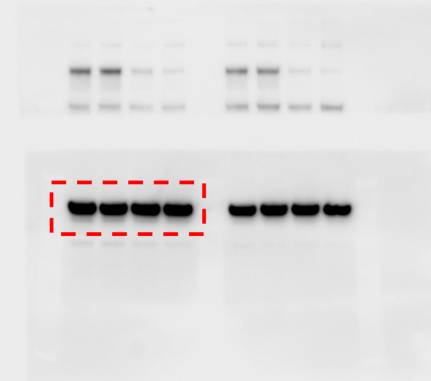

Supplement: mmc2.pdf [file mmc2.pdf]
