# Supplementary material for: The RNA binding proteins LARP4A and LARP4B promote sarcoma and carcinoma growth and metastasis
Source: PubMed Central journal article supplement — iScience. 2024 Feb 24;27(4):109288. doi: 10.1016/j.isci.2024.109288 (PMC10963253; doi:10.1016/j.isci.2024.109288), 2024-02-24

LARP4A – PC3

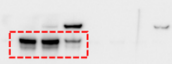

LARP4A – MG63  
*Longer exposure*

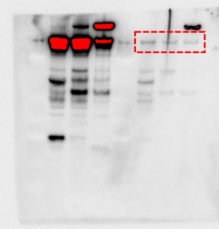

Lamin A/C – PC3 & MG63

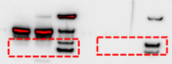

TOM20 – PC3 & MG63

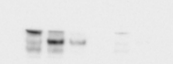

LARP4B – PC3

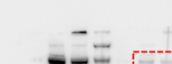

LARP4B – MG63  
*Longer exposure*

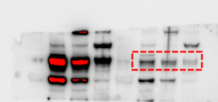

Alpha tubulin  
*(with GAPDH below, not included)*

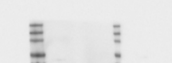

Supplement: mmc3.pdf [file mmc3.pdf]
