# Supplementary material for: The RNA binding proteins LARP4A and LARP4B promote sarcoma and carcinoma growth and metastasis
Source: PubMed Central journal article supplement — iScience. 2024 Feb 24;27(4):109288. doi: 10.1016/j.isci.2024.109288 (PMC10963253; doi:10.1016/j.isci.2024.109288), 2024-02-24

LARP4A siRNA knockdown After 7 days  
Fig. S2A

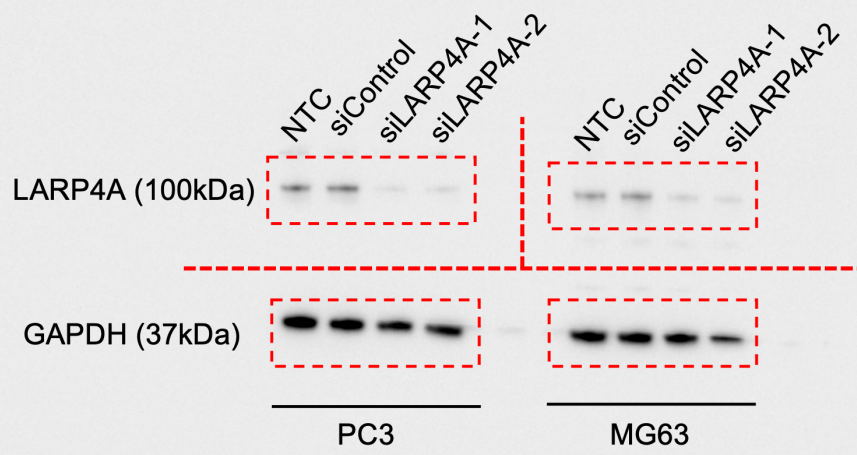

LARP4B siRNA knockdown After 7 days  
Fig. S2B

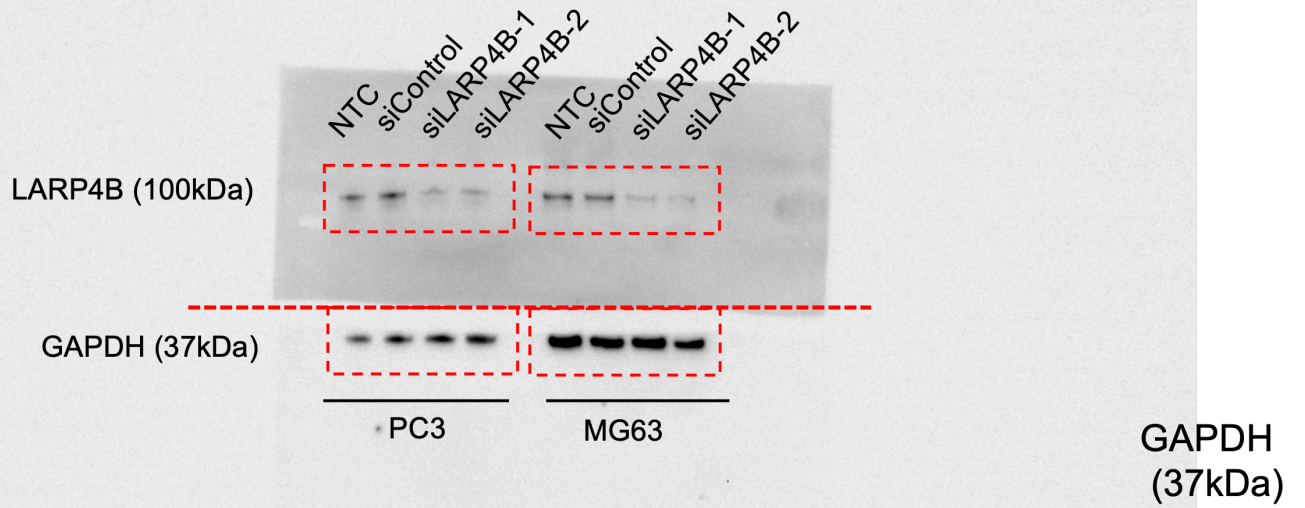

MG63: Probing for LARP4A in LARP4B knockouts and vice versa – Blot 1 higher exposure

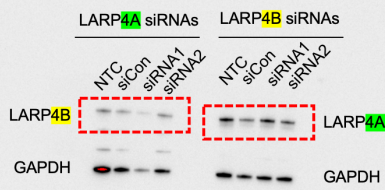

MG63 : Probing for LARP4A in LARP4B knockouts and vice versa – Blot 1 lower exposure

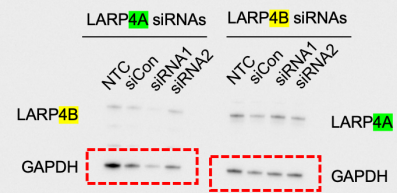

MG63 : Same samples, new gel to probe for LARP4A in LARP4A siRNAs and vice versa – blot 2 higher exposure

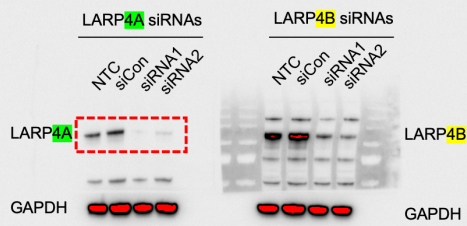

MG63 : Same samples, new gel to probe for LARP4A in LARP4A siRNAs and vice versa – blot 2 lower exposure

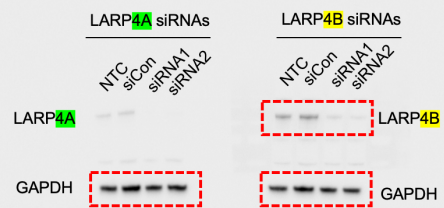

Supplement: mmc4.pdf [file mmc4.pdf]
