# Supplementary material for: The RNA binding proteins LARP4A and LARP4B promote sarcoma and carcinoma growth and metastasis
Source: PubMed Central journal article supplement — iScience. 2024 Feb 24;27(4):109288. doi: 10.1016/j.isci.2024.109288 (PMC10963253; doi:10.1016/j.isci.2024.109288), 2024-02-24

MNNG/HOS cells LARP4A/a-tubulin blot

FigS4

Higher exposure

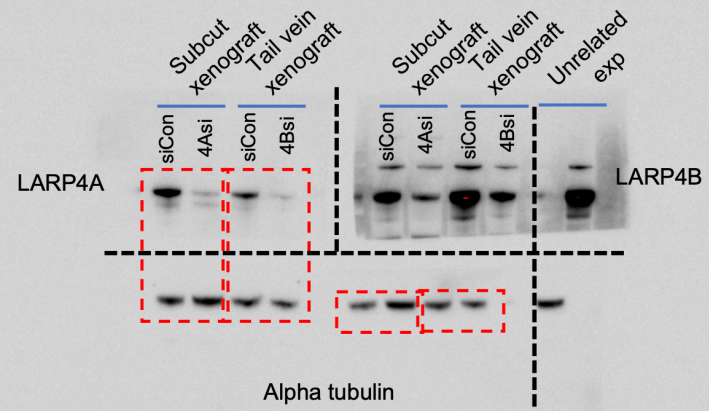

MNNG/HOS cells LARP4A/a-tubulin blot

FigS4

Lower exposure for LARP4B

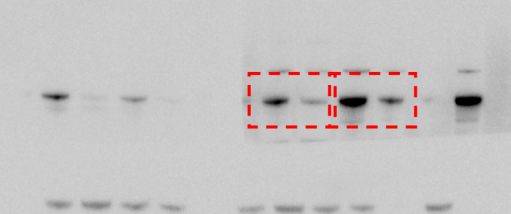

Supplement: mmc5.pdf [file mmc5.pdf]
