# Supplementary material for: The RNA binding proteins LARP4A and LARP4B promote sarcoma and carcinoma growth and metastasis
Source: PubMed Central journal article supplement — iScience. 2024 Feb 24;27(4):109288. doi: 10.1016/j.isci.2024.109288 (PMC10963253; doi:10.1016/j.isci.2024.109288), 2024-02-24

PC3 – pCB6-GFP-LARP4A or B overexpression  
Higher exposure

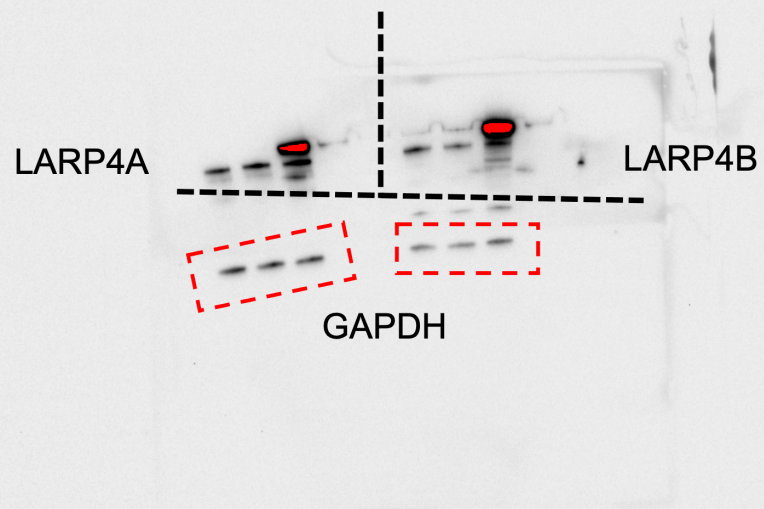

PC3 – pCB6-GFP-LARP4A or B overexpression  
Same blot, lower exposure

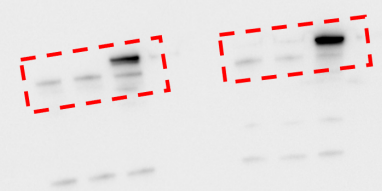

MG63 – pCB6-GFP-LARP4A or B overexpression  
Higher exposure

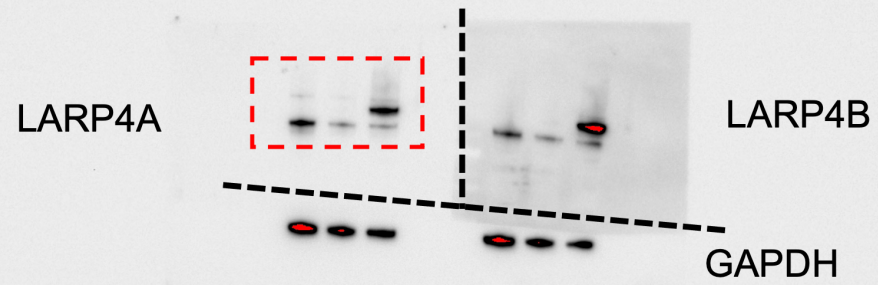

MG63 – pCB6-GFP-LARP4A or B overexpression  
Lower exposure

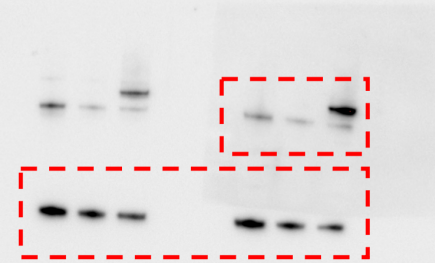

Supplement: mmc6.pdf [file mmc6.pdf]
