# Supplementary material for: The RNA binding proteins LARP4A and LARP4B promote sarcoma and carcinoma growth and metastasis
Source: PubMed Central journal article supplement — iScience. 2024 Feb 24;27(4):109288. doi: 10.1016/j.isci.2024.109288 (PMC10963253; doi:10.1016/j.isci.2024.109288), 2024-02-24

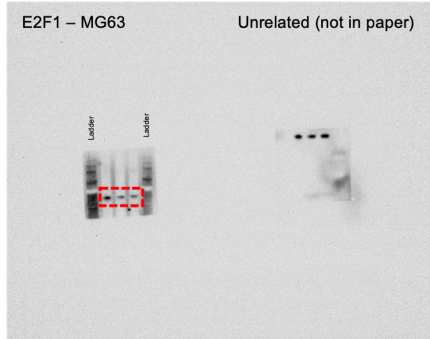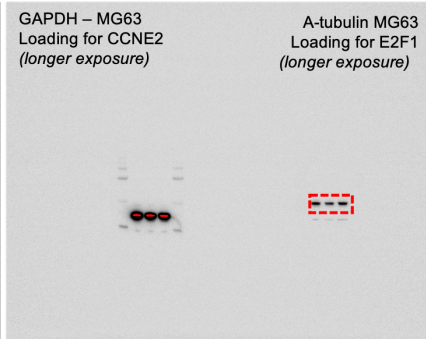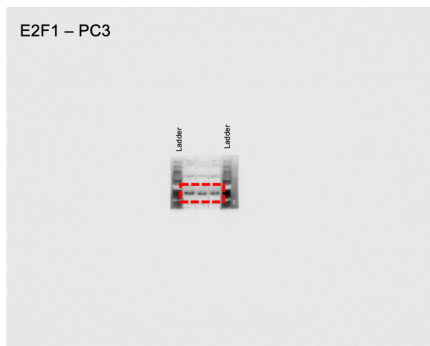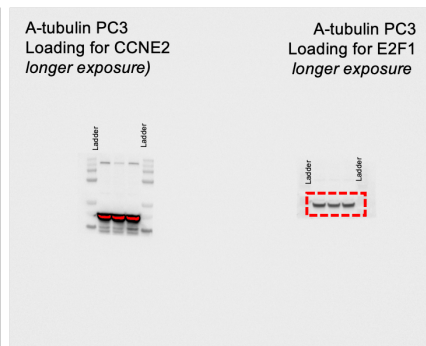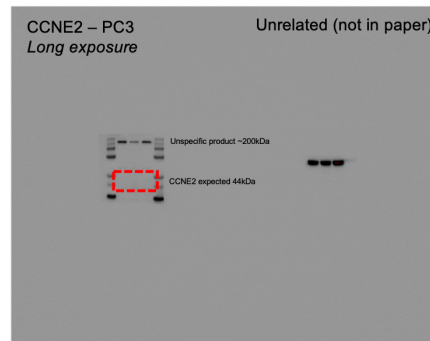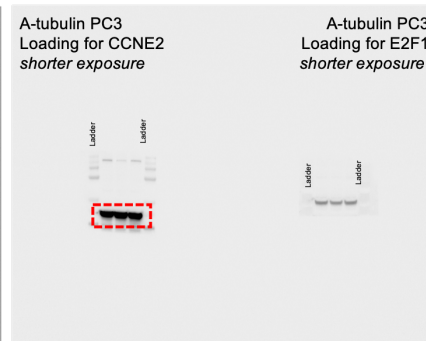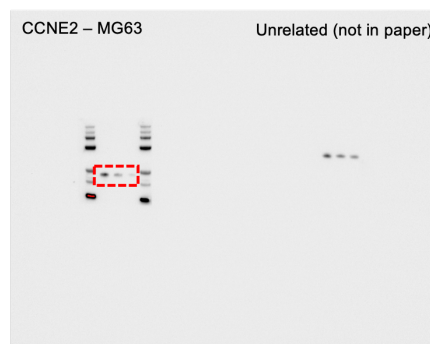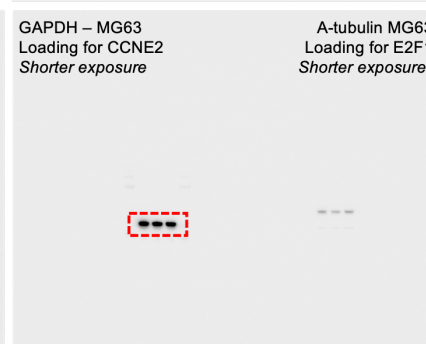

Cyclin B1 – PC3

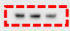

GAPDH – PC3 LHS, MG63 RHS

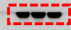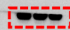

Cyclin B1 – MG63

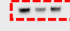

Aurora B PC3 and MG63, panel bottom LHS

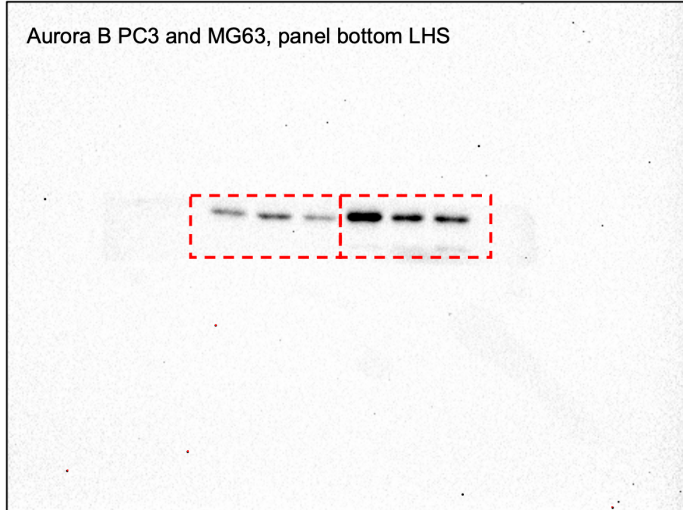

Alpha-tubulin PC3 and MG63, blot 1

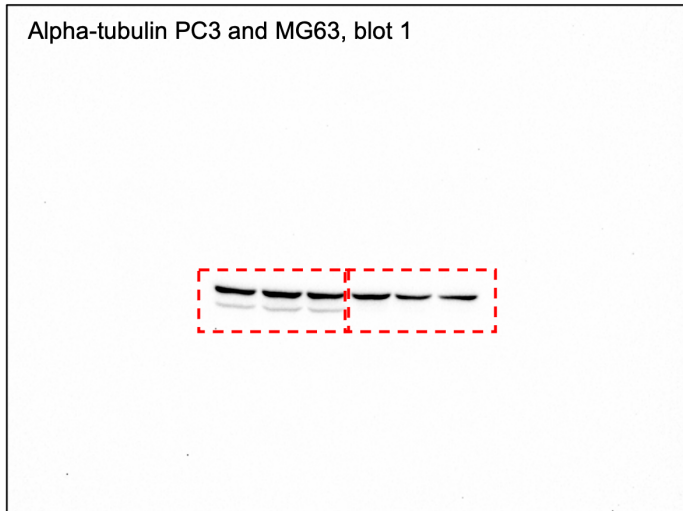

Supplement: mmc7.pdf [file mmc7.pdf]
